# Supplementary material for: Site activation effects promoted by intramolecular hydrogen bond interactions in SNAr reactions
Source: Royal Society of Chemistry journal article supplement (doi:10.1039/c4ra04725g), 2014-01-01

## **Electronic Supplementary Information**

### **Site activation effects promoted by intramolecular Hydrogen Bond interactions in $S_NAr$ reactions.**

Sebastián Gallardo-Fuentes<sup>1</sup>, Renato Contreras<sup>1</sup>, Ricardo A. Tapia<sup>2</sup> and Paola R. Campodónico<sup>3</sup>

<sup>1</sup>Departamento de Química, Facultad de Ciencias, Universidad de Chile, Casilla 653, Santiago, Chile.

<sup>2</sup>Departamento de Química Orgánica, Facultad de Química, Pontificia Universidad Católica de Chile, Casilla 306, Santiago, Chile.

<sup>3</sup>Instituto de Ciencias, Facultad de Medicina, Clínica Alemana Universidad del Desarrollo, Santiago 7710162, Chile.

## Table of contents.

|                                                                                                                                                  |     |
|--------------------------------------------------------------------------------------------------------------------------------------------------|-----|
| Table S1. Kinetic results for the reaction between benzohydrazide and 2-chloro-5-nitropyrimidine.                                                | S4  |
| Table S2. Kinetic results for the reaction between 4-methylbenzohydrazide and 2-chloro-5-nitropyrimidine.                                        | S5  |
| Table S3. Kinetic results for the reaction between 4-chlorobenzohydrazide and 2-chloro-5-nitropyrimidine.                                        | S6  |
| Table S4. Kinetic results for the reaction between 4-methoxybenzohydrazide and 2-chloro-5-nitropyrimidine.                                       | S7  |
| Table S5. Kinetic results for the reaction between 4-(trifluoromethyl) benzohydrazide and 2-chloro-5-nitropyrimidine.                            | S8  |
| Figure S1. Plot of $k_{\text{obs}}$ vs. $[\text{N}]_{\text{F}}$ for the reaction between benzohydrazide and 2-chloro-5-nitropyrimidine.          | S9  |
| Figure S2. Plot of $k_{\text{obs}}$ vs. $[\text{N}]_{\text{F}}$ for the reaction between 4-methylbenzohydrazide and 2-chloro-5-nitropyrimidine.  | S10 |
| Figure S3. Plot of $k_{\text{obs}}$ vs. $[\text{N}]_{\text{F}}$ for the reaction between 4-chlorobenzohydrazide and 2-chloro-5-nitropyrimidine.  | S11 |
| Figure S4. Plot of $k_{\text{obs}}$ vs. $[\text{N}]_{\text{F}}$ for the reaction between 4-methoxybenzohydrazide and 2-chloro-5-nitropyrimidine. | S12 |

Figure S5. Plot of  $k_{\text{obs}}$  vs.  $[\text{N}]_{\text{F}}$  for the reaction between 4-(trifluoromethyl) benzohydrazide and 2-chloro-5-nitropyrimidine. S13

Figure S6. Brønsted-type plots for the reaction between benzohydrazides and 2-chloro-5-nitropyrimidine. S14

Cartesian coordinates, energies (u.a.) and number of imaginary frequencies (NIMAG) for:  
Transition State, intermediates, reactants and products structures S15–S24  
 $^1\text{H}$  and  $^{13}\text{C}$  NMR spectra for the final product S25–S27

**Table S1.** Experimental conditions and  $k_{\text{obs}}$  values for the reactions of benzoic hydrazide with 2-chloro-5-nitropyrimidine in water, at 25.0 °C, ionic strength 0.2 M (KCl).

| pH= 2.7                         |                                    | pH= 3.0                         |                                    | pH= 3.3                         |                                    |
|---------------------------------|------------------------------------|---------------------------------|------------------------------------|---------------------------------|------------------------------------|
| $F_N=0.333$                     |                                    | $F_N=0.500$                     |                                    | $F_N=0.667$                     |                                    |
| $10^3[N]_{\text{tot}}/\text{M}$ | $10^3k_{\text{obs}}/\text{s}^{-1}$ | $10^3[N]_{\text{tot}}/\text{M}$ | $10^3k_{\text{obs}}/\text{s}^{-1}$ | $10^3[N]_{\text{tot}}/\text{M}$ | $10^3k_{\text{obs}}/\text{s}^{-1}$ |
| 4,47                            | 1,49                               | 3,54                            | 0,14                               | 18,3                            | 0,73                               |
| 11,2                            | 3,73                               | 8,86                            | 0,32                               | 25,1                            | 0,90                               |
| 17,9                            | 5,97                               | 14,2                            | 0,53                               | 32,0                            | 1,60                               |
| 24,6                            | 8,21                               | 19,5                            | 0,75                               | 38,9                            | 1,86                               |
| 31,3                            | 10,4                               | 24,8                            | 0,90                               | 45,7                            | 2,18                               |
| 37,9                            | 12,7                               | 30,1                            | 1,20                               |                                 |                                    |
| 44,7                            | 14,9                               | 35,4                            | 1,41                               |                                 |                                    |

**Table S2.** Experimental conditions and  $k_{\text{obs}}$  values for the reactions of *p*-toluic hydrazide with 2-chloro-5-nitropyrimidine in water, at 25.0 °C, ionic strength 0.2 M (KCl).

| pH= 3.1<br>$F_N=0.334$          |                                    | pH= 3.5<br>$F_N=0.557$          |                                    | pH= 3.7<br>$F_N=0.666$          |                                    |
|---------------------------------|------------------------------------|---------------------------------|------------------------------------|---------------------------------|------------------------------------|
| $10^3[N]_{\text{tot}}/\text{M}$ | $10^3k_{\text{obs}}/\text{s}^{-1}$ | $10^3[N]_{\text{tot}}/\text{M}$ | $10^3k_{\text{obs}}/\text{s}^{-1}$ | $10^3[N]_{\text{tot}}/\text{M}$ | $10^3k_{\text{obs}}/\text{s}^{-1}$ |
| 2,67                            | 0,16                               | 2,76                            | 0,18                               | 2,89                            | 0,20                               |
| 6,68                            | 0,31                               | 6,89                            | 0,45                               | 7,23                            | 0,45                               |
| 10,7                            | 0,47                               | 11,0                            | 0,75                               | 11,6                            | 0,87                               |
| 14,7                            | 0,70                               | 15,2                            | 1,00                               | 15,9                            | 1,16                               |
| 18,7                            | 0,90                               | 19,3                            | 1,09                               | 20,2                            | 1,57                               |
| 22,7                            |                                    | 23,4                            | 1,55                               | 24,6                            | 1,90                               |
| 26,7                            | 1,38                               | 27,6                            | 1,89                               | 28,9                            | 2,27                               |

**Table S3.** Experimental conditions and  $k_{\text{obs}}$  values for the reactions of 4-chlorobenzoic hydrazide with 2-chloro-5-nitropyrimidine in water, at 25.0 °C, ionic strength 0.2 M (KCl).

| pH= 2.5<br>$F_N=0.334$          |                                    | pH= 2.8<br>$F_N=0.500$          |                                    | pH=3.1<br>$F_N=0.666$           |                                    |
|---------------------------------|------------------------------------|---------------------------------|------------------------------------|---------------------------------|------------------------------------|
| $10^3[N]_{\text{tot}}/\text{M}$ | $10^3k_{\text{obs}}/\text{s}^{-1}$ | $10^3[N]_{\text{tot}}/\text{M}$ | $10^3k_{\text{obs}}/\text{s}^{-1}$ | $10^3[N]_{\text{tot}}/\text{M}$ | $10^3k_{\text{obs}}/\text{s}^{-1}$ |
| 1,58                            | 0,02                               | 1,67                            | 0,04                               | 1,63                            | 0,06                               |
| 3,94                            | 0,06                               | 4,19                            | 0,10                               | 4,09                            | 0,15                               |
| 6,31                            | 0,08                               | 6,70                            | 0,17                               | 6,54                            | 0,24                               |
| 8,68                            | 0,13                               | 9,21                            | 0,22                               | 8,99                            | 0,34                               |
| 11,0                            | 0,18                               | 11,7                            | 0,29                               | 11,4                            | 0,44                               |
| 13,4                            | 0,22                               | 14,2                            | 0,35                               | 13,9                            | 0,47                               |
| 15,8                            | 0,26                               | 16,7                            | 0,43                               | 16,3                            | 0,59                               |

**Table S4.** Experimental conditions and  $k_{\text{obs}}$  values for the reactions of 4-methoxy-benzhydrazide with 2-chloro-5-nitropyrimidine in water, at 25.0 °C, ionic strength 0.2 M (KCl).

| pH= 3,2<br>$F_N=0.355$          |                                    | pH= 3,50<br>$F_N=0.523$         |                                    | pH= 3,80<br>$F_N=0.686$         |                                    |
|---------------------------------|------------------------------------|---------------------------------|------------------------------------|---------------------------------|------------------------------------|
| $10^3[N]_{\text{tot}}/\text{M}$ | $10^3k_{\text{obs}}/\text{s}^{-1}$ | $10^3[N]_{\text{tot}}/\text{M}$ | $10^3k_{\text{obs}}/\text{s}^{-1}$ | $10^3[N]_{\text{tot}}/\text{M}$ | $10^3k_{\text{obs}}/\text{s}^{-1}$ |
| 3,32                            | 0,17                               | 3,48                            | 0,26                               | 3,29                            | 0,29                               |
| 8,31                            | 0,39                               | 8,70                            | 0,65                               | 8,21                            | 0,68                               |
| 13,3                            | 0,65                               | 13,9                            | 1,11                               | 13,1                            | 1,10                               |
| 18,3                            | 0,86                               | 19,1                            | 1,41                               | 18,1                            | 1,50                               |
| 23,3                            | 1,14                               | 24,4                            | 1,76                               | 23,0                            | 1,87                               |
| 28,3                            | 1,48                               | 29,6                            | 2,17                               | 27,9                            | 2,38                               |
| 33,2                            | 1,61                               | 34,8                            | 2,49                               | 32,9                            | 2,81                               |

**Table S5.** Experimental conditions and  $k_{\text{obs}}$  values for the reactions of 4-(trifluoromethyl)benzhydrazide with 2-chloro-5-nitropyrimidine in water, at 25.0 °C, ionic strength 0.2 M (KCl).

| pH= 2.4<br>$F_N=0.334$                 |                                    | pH= 2.7<br>$F_N=0.500$                 |                                    | pH= 3.0<br>$F_N=0.666$                 |                                    |
|----------------------------------------|------------------------------------|----------------------------------------|------------------------------------|----------------------------------------|------------------------------------|
| $10^3[\text{N}]_{\text{tot}}/\text{M}$ | $10^3k_{\text{obs}}/\text{s}^{-1}$ | $10^3[\text{N}]_{\text{tot}}/\text{M}$ | $10^3k_{\text{obs}}/\text{s}^{-1}$ | $10^3[\text{N}]_{\text{tot}}/\text{M}$ | $10^3k_{\text{obs}}/\text{s}^{-1}$ |
| 1,11                                   | 0,03                               | 0,99                                   | 0,03                               | 1,10                                   | 0,04                               |
| 2,77                                   | 0,06                               | 2,48                                   | 0,08                               | 2,75                                   | 0,05                               |
| 4,43                                   | 0,10                               | 3,97                                   | 0,13                               | 4,40                                   | 0,14                               |
| 6,09                                   | 0,15                               | 5,46                                   | 0,20                               | 6,05                                   | 0,19                               |
| 7,75                                   | 0,19                               | 6,95                                   | 0,23                               | 7,70                                   | 0,30                               |
| 9,41                                   | 0,23                               | 8,44                                   | 0,29                               | 9,35                                   | 0,32                               |
| 11,1                                   | 0,24                               | 9,93                                   | 0,32                               | 1,10                                   | 0,41                               |



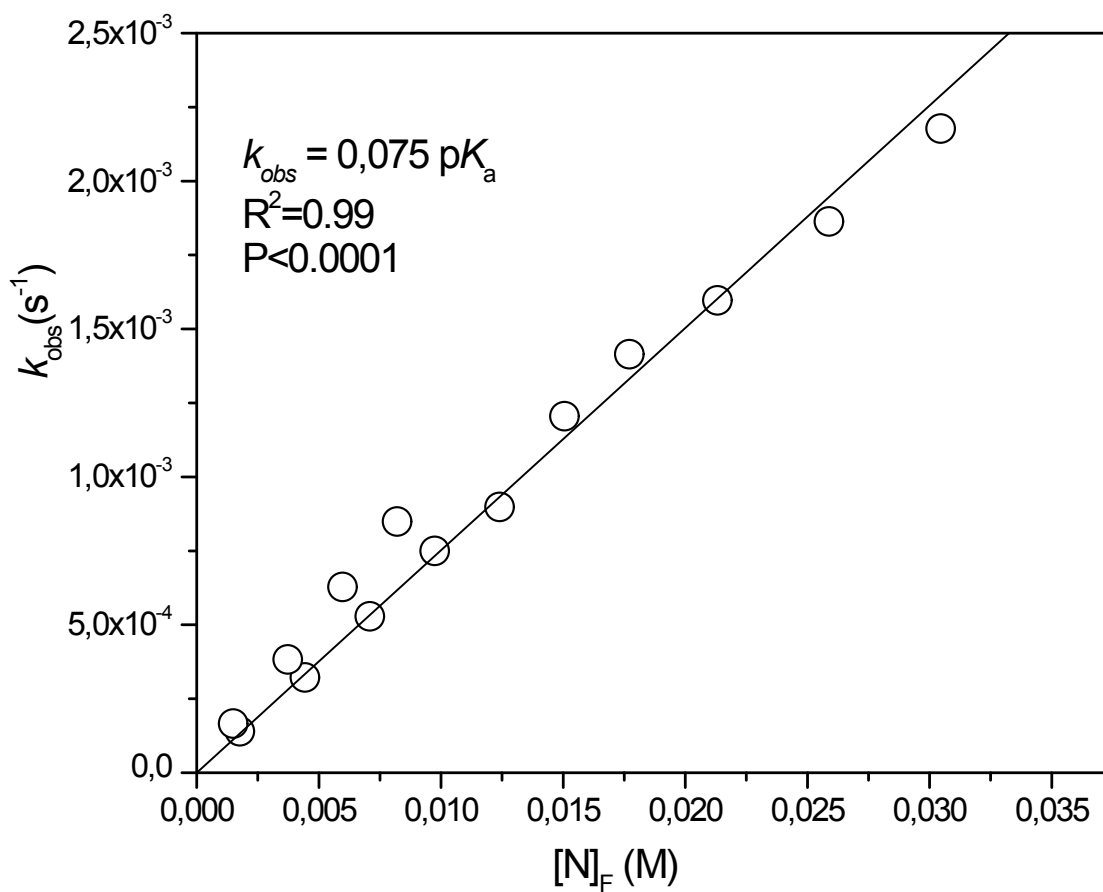

**Figure S1.**  $k_{obs}$  vs. free concentration of benzoic hydrazide in water, at 25.0 °C, ionic strength 0.2 M (KCl).

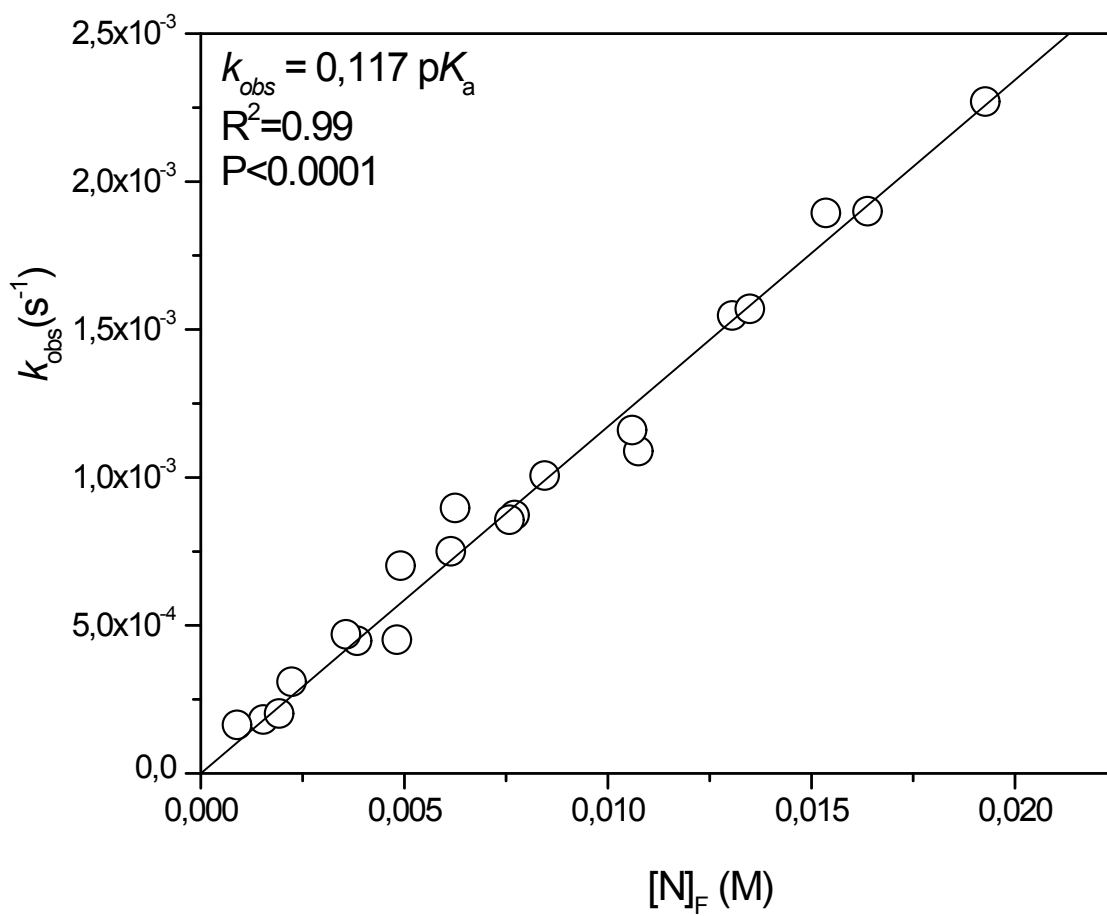

**Figure S2.**  $k_{obs}$  vs. free concentration of  $p$ -toluic hydrazide in water, at 25.0 °C, ionic strength 0.2 M (KCl).

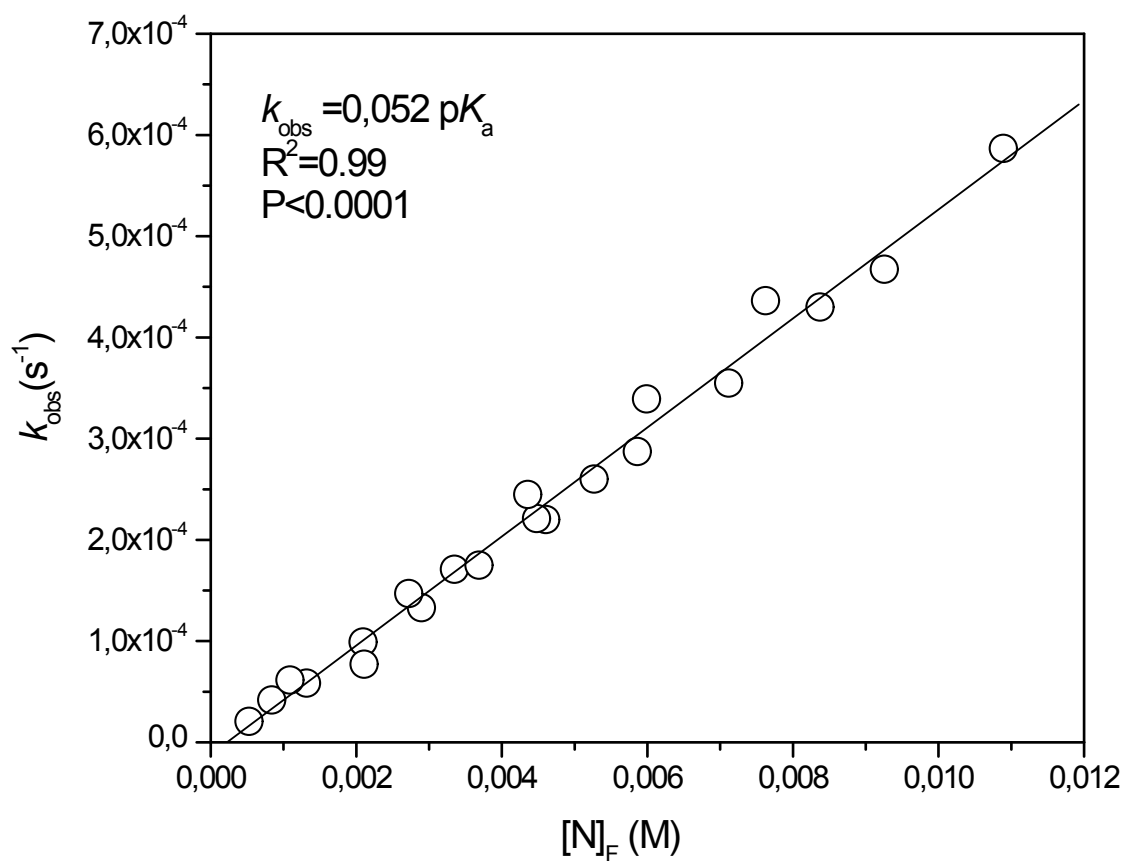

**Figure S3.**  $k_{\text{obs}}$  vs. free concentration of 4-chlorobenzoic hydrazide in water, at 25.0 °C, ionic strength 0.2 M (KCl).

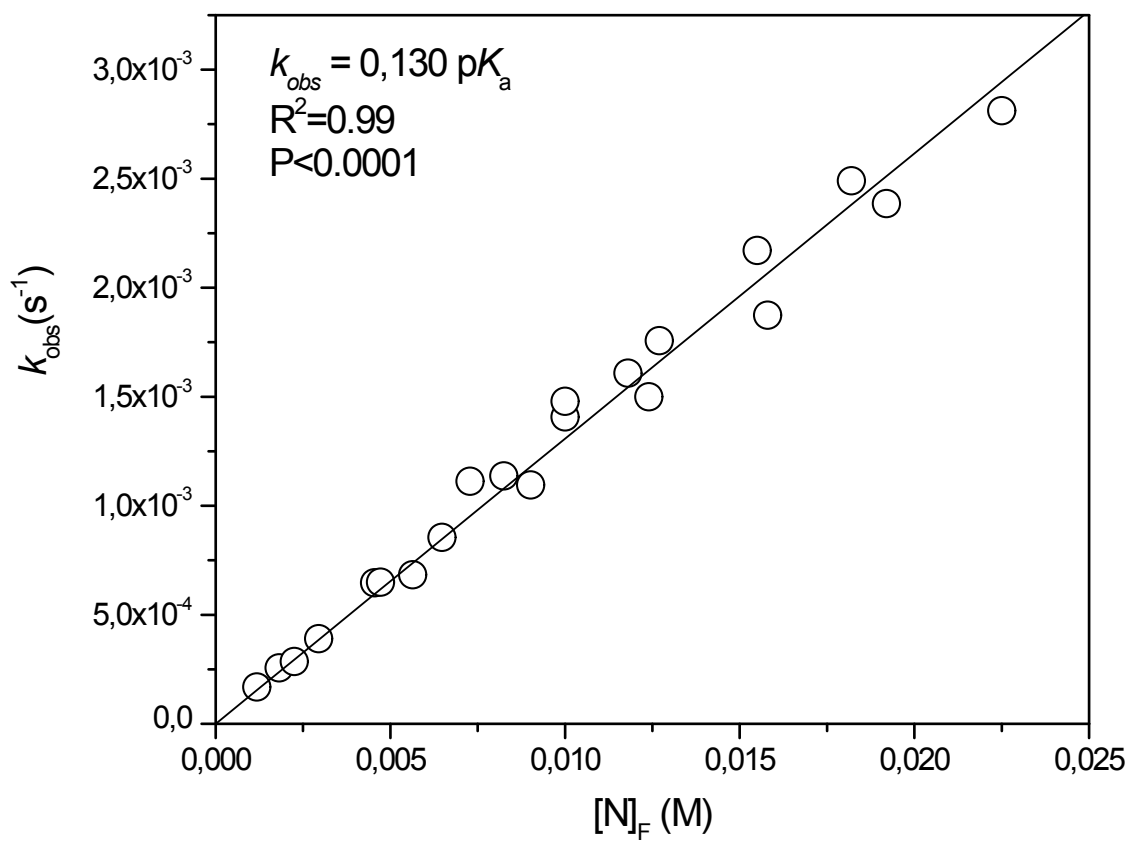

**Figure S4.**  $k_{obs}$  vs. free concentration of 4-methoxy-benzhydrazide in water, at 25.0 °C, ionic strength 0.2 M (KCl).

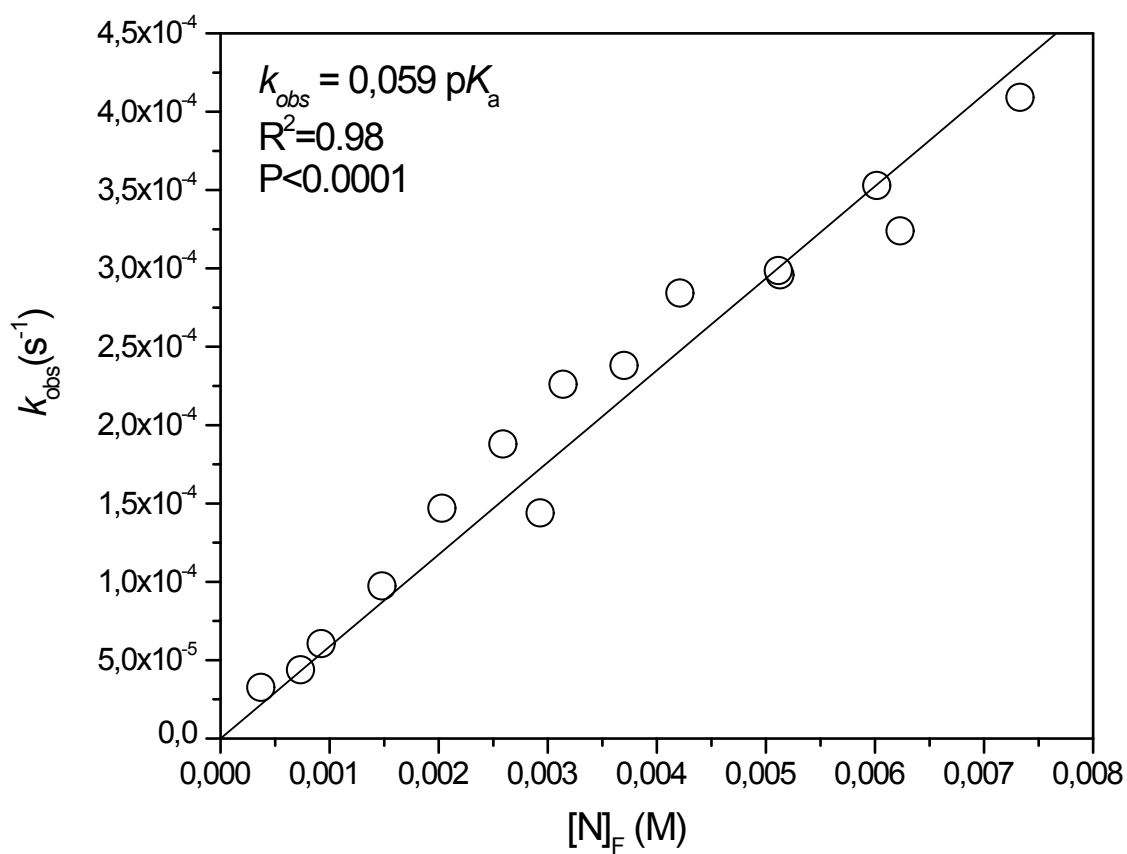

**Figure S5.**  $k_{\text{obs}}$  vs. free concentration of 4-(trifluoromethyl)benzhydrazide in water, at 25.0 °C, ionic strength 0.2 M (KCl).

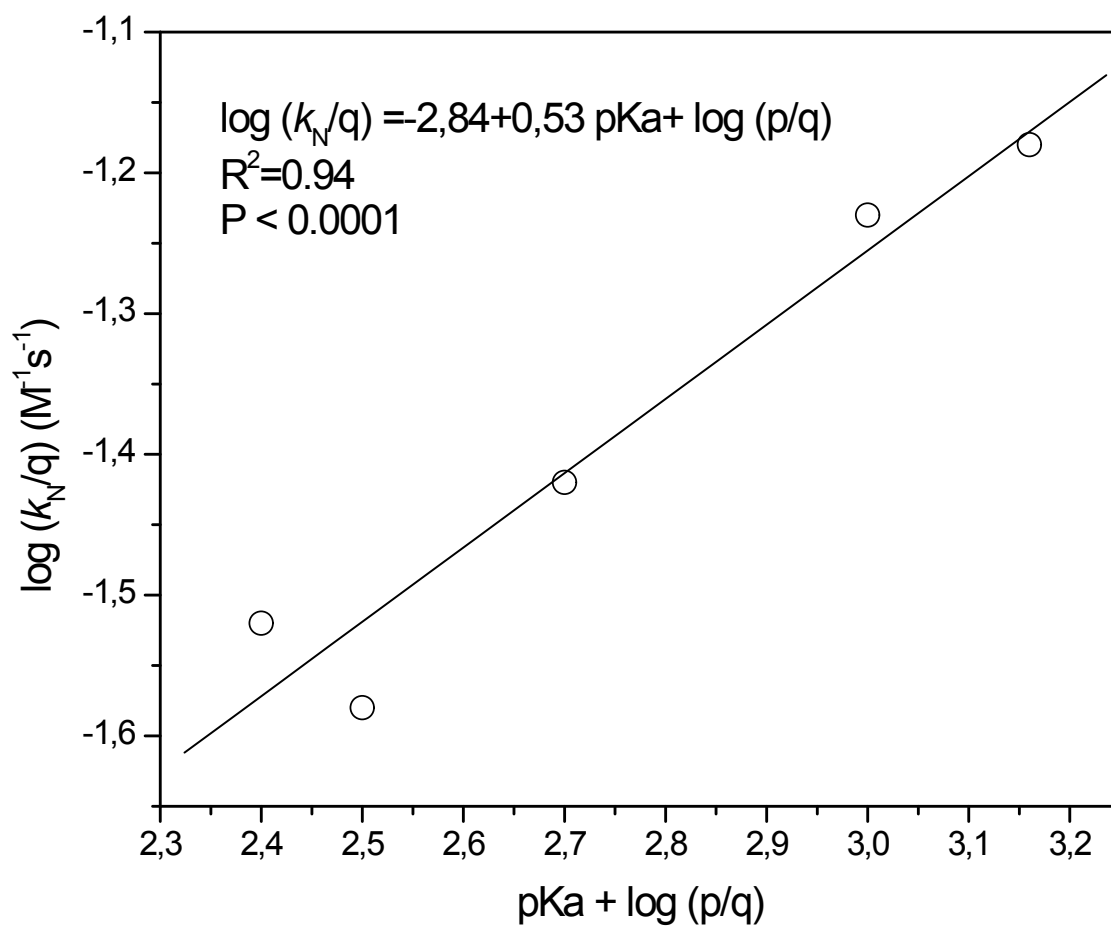

**Figure S6.** Brønsted-type plot (statistically corrected) for the reactions of benzohydrazides derivatives with 2-chloro-5-nitropyrimidine. in aqueous solution, at 25.0 °C and an ionic strength of 0.2 M.

**Cartesian coordinates, total energies and number of imaginary frequencies (NIMAG).**

Transition State (TS-1) for the reaction between benzohydrazide towards 2-chloro-5-nitropyrimidine calculated at the M05-2X/6-31G(d,p) level of theory in gas phase.

|    |             |             |             |
|----|-------------|-------------|-------------|
| C  | 3.43374600  | -0.98391400 | 0.03866700  |
| C  | 1.20848900  | -0.75140700 | 0.44457300  |
| C  | 2.38924000  | 1.16576200  | 0.06529900  |
| C  | 3.54906100  | 0.40656400  | -0.07709000 |
| H  | 4.30991800  | -1.60944700 | -0.08698200 |
| N  | 2.29159000  | -1.57471500 | 0.29993800  |
| N  | 1.22307200  | 0.61778500  | 0.33593100  |
| Cl | 0.10909000  | -1.28085300 | 1.78259800  |
| N  | 4.80988900  | 1.02850900  | -0.34353300 |
| O  | 4.83363500  | 2.24576700  | -0.43046400 |
| O  | 5.78195300  | 0.30312000  | -0.47458000 |
| H  | 2.43224700  | 2.24358800  | -0.03962300 |
| N  | 0.13234500  | -1.24610600 | -0.92228600 |
| H  | 0.70150800  | -1.23360400 | -1.76694500 |
| N  | -0.94257900 | -0.36496100 | -1.02060300 |
| H  | -0.68503700 | 0.54031100  | -0.63557100 |
| H  | -0.24752700 | -2.18799500 | -0.77165000 |
| C  | -2.17867300 | -0.92383400 | -0.73577300 |
| O  | -2.34507200 | -2.12514500 | -0.84557000 |
| C  | -3.24550100 | 0.03870000  | -0.36231400 |
| C  | -4.55911300 | -0.30405600 | -0.68355900 |
| C  | -2.97135800 | 1.22333000  | 0.32471000  |
| C  | -5.59658100 | 0.55588400  | -0.34968300 |
| H  | -4.74254300 | -1.24229900 | -1.19053200 |
| C  | -4.01607800 | 2.07427900  | 0.66654000  |
| H  | -1.96277400 | 1.46694800  | 0.64031200  |
| C  | -5.32404500 | 1.74607600  | 0.32121700  |
| H  | -6.61589400 | 0.29842900  | -0.60654200 |
| H  | -3.80992000 | 2.98684000  | 1.21041400  |
| H  | -6.13397400 | 2.41390000  | 0.58622400  |

Energy -1384.54927145 atomic units NIMAG = 1 ,  $\nu_I$  (cm<sup>-1</sup>) = 240i

Transition State (TS-2) for the reaction between benzohydrazide towards 2-chloro-5-nitropyrimidine calculated at the M05-2X/6-31G(d,p) level of theory in gas phase.

|    |             |             |             |
|----|-------------|-------------|-------------|
| C  | 0.96974800  | 0.00020900  | -0.64112600 |
| N  | 1.50069900  | -1.18807700 | -0.92248000 |
| C  | 2.77655000  | -1.29134000 | -0.59160900 |
| C  | 3.47269600  | -0.18390200 | -0.10676000 |
| C  | 2.85943000  | 1.06353500  | -0.14978700 |
| N  | 1.58025900  | 1.16663000  | -0.48113600 |
| H  | 3.27736100  | -2.23953400 | -0.73629100 |
| H  | 3.41931600  | 1.96661100  | 0.05306400  |
| N  | 4.87015600  | -0.29902700 | 0.25948000  |
| O  | 5.44165600  | 0.71977800  | 0.59517900  |
| O  | 5.36979700  | -1.40559400 | 0.20151700  |
| Cl | -0.05414000 | -0.41777500 | 1.52926300  |
| N  | -0.43870300 | 0.08571400  | -1.14857600 |
| H  | -0.94160400 | -0.55443100 | -0.49861700 |
| H  | -0.45460000 | -0.27437800 | -2.10598100 |
| N  | -1.01117000 | 1.37952700  | -1.08456900 |
| H  | -0.26436000 | 2.04928800  | -0.89805400 |
| C  | -2.07370900 | 1.55390500  | -0.15223900 |
| O  | -2.16195000 | 2.60149700  | 0.43207800  |
| C  | -3.06665600 | 0.44863000  | -0.07100800 |
| C  | -3.63660400 | 0.17739800  | 1.17292000  |
| C  | -3.46195200 | -0.26439400 | -1.20492000 |
| C  | -4.58961600 | -0.82486400 | 1.28299700  |
| H  | -3.30084900 | 0.74066200  | 2.03320600  |
| C  | -4.42746700 | -1.25925800 | -1.08980400 |
| H  | -3.05143200 | -0.01342800 | -2.17730600 |
| C  | -4.98367800 | -1.54181700 | 0.15418000  |
| H  | -5.02265200 | -1.05257100 | 2.24805400  |
| H  | -4.74921400 | -1.80543000 | -1.96694000 |
| H  | -5.72875400 | -2.32203400 | 0.24510700  |

Energy -1384.54433336 atomic units NIMAG = 1 ,  $v_I$  (cm<sup>-1</sup>) = 225i



Reactive complex for the reaction between benzohydrazide towards 2-chloro-5-nitropyrimidine  
calculated at the M05-2X/6-31G(d,p) level of theory in gas phase.

|    |             |             |             |
|----|-------------|-------------|-------------|
| C  | 0.02723400  | -0.19917500 | -0.11057900 |
| C  | -0.04182600 | 0.05862700  | 2.12056900  |
| C  | 2.01989100  | 0.01270400  | 1.19348700  |
| C  | 1.41172500  | -0.14955400 | -0.04216300 |
| H  | -0.47928500 | -0.32493500 | -1.05894900 |
| N  | -0.71335500 | -0.09297800 | 0.98865300  |
| N  | 1.27317200  | 0.11715700  | 2.29362900  |
| Cl | -0.99440000 | 0.19989500  | 3.55336600  |
| N  | 2.21464000  | -0.26761700 | -1.25260300 |
| O  | 3.41962700  | -0.22680500 | -1.12146600 |
| O  | 1.61378800  | -0.39854600 | -2.29987400 |
| H  | 3.09681700  | 0.06525000  | 1.32156800  |
| N  | 4.54932700  | 0.34629000  | 3.18760700  |
| H  | 5.19654300  | -0.42591100 | 3.31017100  |
| N  | 3.61874600  | 0.28304100  | 4.23366200  |
| H  | 2.65559500  | 0.33234900  | 3.93785100  |
| H  | 5.10745700  | 1.18492200  | 3.33043100  |
| C  | 3.99948800  | 0.64280000  | 5.49030700  |
| O  | 5.15806800  | 0.93964900  | 5.74700300  |
| C  | 2.91437700  | 0.65225300  | 6.52103700  |
| C  | 3.16826800  | 1.34276300  | 7.70540400  |
| C  | 1.69464500  | -0.00355400 | 6.34433000  |
| C  | 2.20020500  | 1.39671000  | 8.70003100  |
| H  | 4.13072400  | 1.82367700  | 7.82076600  |
| C  | 0.72798400  | 0.05119800  | 7.34218700  |
| H  | 1.49968200  | -0.57527400 | 5.44534200  |
| C  | 0.97811200  | 0.75359600  | 8.51780700  |
| H  | 2.39739100  | 1.93693000  | 9.61724500  |
| H  | -0.21600700 | -0.46101500 | 7.20440700  |
| H  | 0.22394800  | 0.79434100  | 9.29396400  |

Energy -1384.57800550 atomic units NIMAG = 0

Meisenheimer complex for the reaction between benzohydrazide towards 2-chloro-5-nitropyrimidine calculated at the M05-2X/6-31G(d,p) level of theory in gas phase.

|    |             |             |             |
|----|-------------|-------------|-------------|
| C  | -0.00078600 | 0.00301100  | 0.00046400  |
| C  | 0.00000100  | -0.00050100 | 1.39608800  |
| C  | 1.20331000  | -0.00306100 | 2.10525400  |
| C  | 2.40663900  | 0.01103400  | 1.41128600  |
| C  | 2.40675100  | 0.02856700  | 0.01866900  |
| C  | 1.20521000  | 0.02253200  | -0.68618300 |
| H  | -0.94970800 | -0.00228900 | -0.51897100 |
| H  | 1.20943000  | -0.04672200 | 3.18739800  |
| H  | 3.34208400  | 0.00288100  | 1.95498300  |
| H  | 3.34666900  | 0.04303000  | -0.51835600 |
| H  | 1.20999400  | 0.03442900  | -1.76822100 |
| C  | -1.31892100 | -0.00435900 | 2.06590500  |
| O  | -2.36821000 | -0.30119200 | 1.52752200  |
| N  | -1.31112000 | 0.32661400  | 3.42516300  |
| H  | -0.68216500 | 1.04961600  | 3.77424100  |
| N  | -2.60250400 | 0.57255000  | 3.92007300  |
| H  | -2.82809100 | -0.06582200 | 4.68626100  |
| C  | -2.78345000 | 1.98317800  | 4.47250400  |
| C  | -4.17681500 | 3.00515300  | 5.90010400  |
| C  | -1.80818200 | 3.32609700  | 5.98717100  |
| C  | -3.08838900 | 3.79545500  | 6.29951100  |
| H  | -5.15080000 | 3.15960900  | 6.34799800  |
| H  | -0.94203800 | 3.73093700  | 6.49580000  |
| H  | -3.26012100 | 0.41618100  | 3.13407500  |
| Cl | -2.82866100 | 2.97396300  | 2.73410900  |
| N  | -4.02992200 | 2.02145700  | 5.04449600  |
| N  | -1.63430100 | 2.34240700  | 5.13327400  |
| N  | -3.26306400 | 4.85734700  | 7.24369500  |
| O  | -2.26170400 | 5.42683600  | 7.64765300  |
| O  | -4.40250800 | 5.13227400  | 7.58263000  |

Energy -1384.55886311 atomic units NIMAG = 0

Product complex for the reaction between benzohydrazide towards 2-chloro-5-nitropyrimidine  
 calculated at the M05-2X/6-31G(d,p) level of theory in gas phase.

|    |             |             |             |
|----|-------------|-------------|-------------|
| C  | 0.02244200  | -0.03542100 | -0.01538600 |
| N  | -0.01870800 | 0.04338700  | 1.32643600  |
| C  | 1.15270400  | 0.04774800  | 1.93416800  |
| C  | 2.34099400  | -0.03667700 | 1.21221900  |
| C  | 2.26922200  | -0.12029700 | -0.17142700 |
| N  | 1.10331400  | -0.12088600 | -0.80063600 |
| H  | 1.17207200  | 0.11419300  | 3.01500100  |
| H  | 3.17219000  | -0.18693600 | -0.76534900 |
| N  | 3.61867400  | -0.03950800 | 1.88852800  |
| O  | 4.61668100  | -0.12800800 | 1.19876900  |
| O  | 3.60783000  | 0.04331000  | 3.10248300  |
| Cl | 1.30227100  | 3.37435900  | 0.37487600  |
| N  | -1.19362300 | -0.01883500 | -0.62530400 |
| H  | 0.68760200  | 3.64982000  | -0.72004900 |
| H  | -2.00560400 | -0.04674000 | -0.03183200 |
| N  | -1.35331800 | -0.26847300 | -1.96492800 |
| H  | -1.11212000 | -1.20978600 | -2.25453900 |
| C  | -0.89475900 | 0.65027100  | -2.90951000 |
| O  | -0.52918100 | 0.25526000  | -3.99458100 |
| C  | -0.94162000 | 2.10419600  | -2.56620700 |
| C  | -0.00235000 | 2.92196900  | -3.19534200 |
| C  | -1.91962700 | 2.66699200  | -1.74492000 |
| C  | -0.02034600 | 4.29633600  | -2.97869700 |
| H  | 0.72696900  | 2.46357600  | -3.85013900 |
| C  | -1.94676800 | 4.04291100  | -1.54231500 |
| H  | -2.66974500 | 2.03905000  | -1.28393600 |
| C  | -0.99471500 | 4.85731800  | -2.15213800 |
| H  | 0.71612900  | 4.92904100  | -3.45714600 |
| H  | -2.70855900 | 4.47976900  | -0.90994800 |
| H  | -1.01183700 | 5.92685900  | -1.98519900 |

Energy -1384.59640604 atomic units NIMAG = 0

Transition State (TS-1a) for the reaction between benzohydrazide towards 2-chloro-5-nitropyrimidine calculated at the M05-2X/6-31G(d,p) level of theory in water (PCM)

|    |             |             |             |
|----|-------------|-------------|-------------|
| C  | -0.04541200 | 0.00057400  | 0.00017500  |
| C  | -0.04450500 | -0.16698000 | 2.26274200  |
| C  | 1.99305900  | -0.12252000 | 1.25219600  |
| C  | 1.35428100  | 0.05619100  | 0.02327100  |
| H  | -0.57560500 | 0.05289200  | -0.94320600 |
| N  | -0.75514100 | -0.14459000 | 1.09431800  |
| N  | 1.31784200  | -0.27627100 | 2.37107800  |
| Cl | -0.87331100 | -1.12016300 | 3.54265500  |
| N  | 2.10411200  | 0.19381300  | -1.17957300 |
| O  | 3.32506300  | 0.19107800  | -1.10313500 |
| O  | 1.49051900  | 0.31619600  | -2.23085900 |
| H  | 3.07428700  | -0.16400400 | 1.30503000  |
| N  | -0.36590000 | 1.51061300  | 2.98963300  |
| H  | -0.12690300 | 2.21033600  | 2.28773600  |
| N  | 0.39341000  | 1.68265800  | 4.14113500  |
| H  | 1.30453900  | 1.24468400  | 4.07264600  |
| H  | -1.35080600 | 1.61570400  | 3.25261100  |
| C  | -0.29935400 | 1.73938200  | 5.32497800  |
| O  | -1.49776900 | 1.98682900  | 5.32790200  |
| C  | 0.50507000  | 1.54061600  | 6.55858200  |
| C  | 0.07114600  | 2.18787800  | 7.71690900  |
| C  | 1.62975600  | 0.71254800  | 6.59271100  |
| C  | 0.77857400  | 2.03194500  | 8.90186200  |
| H  | -0.81282400 | 2.81026000  | 7.67095000  |
| C  | 2.32788500  | 0.55157600  | 7.78478500  |
| H  | 1.94581700  | 0.16044700  | 5.71531100  |
| C  | 1.90781800  | 1.21528400  | 8.93495500  |
| H  | 0.45048200  | 2.54222200  | 9.79798200  |
| H  | 3.19324400  | -0.09718700 | 7.81651200  |
| H  | 2.45626000  | 1.09016700  | 9.85977800  |

Energy -1384.57033305 atomic units NIMAG = 1,  $v_I$  (cm<sup>-1</sup>) = 257i

Transition State (TS-1b) for the reaction between benzohydrazide towards 2-chloro-5-nitropyrimidine calculated at the M05-2X/6-31G(d,p) level of theory in water (PCM)

|    |             |             |             |
|----|-------------|-------------|-------------|
| C  | -0.02754500 | 0.42551400  | 0.22942500  |
| C  | 0.00945000  | 0.11870600  | 2.46845900  |
| C  | 2.00449400  | 0.53508700  | 1.49028100  |
| C  | 1.31864600  | 0.81686900  | 0.30283800  |
| H  | -0.54149900 | 0.42322400  | -0.72446300 |
| N  | -0.68597300 | 0.01015600  | 1.28561700  |
| N  | 1.38025000  | 0.13418600  | 2.57544500  |
| Cl | -0.73015900 | -0.85611100 | 3.77567900  |
| N  | 2.01337400  | 1.27682500  | -0.85167200 |
| O  | 3.21297800  | 1.49688400  | -0.75616500 |
| O  | 1.37276800  | 1.44512400  | -1.88091400 |
| H  | 3.08445700  | 0.61210600  | 1.52321500  |
| N  | -0.48864500 | 1.77040100  | 3.04153600  |
| H  | -0.20507100 | 2.39851700  | 2.28795100  |
| H  | -1.50608400 | 1.80726100  | 3.11419600  |
| C  | 1.86471100  | 3.44975700  | 3.08358900  |
| C  | 1.03108800  | 4.34331900  | 2.40482100  |
| C  | 3.19116700  | 3.28072600  | 2.68203100  |
| C  | 1.51838200  | 5.03254100  | 1.29772100  |
| H  | 0.02076300  | 4.52632700  | 2.75444500  |
| C  | 3.66730100  | 3.96112000  | 1.56854800  |
| H  | 3.82718400  | 2.60337900  | 3.23798900  |
| C  | 2.82889400  | 4.83121500  | 0.87285800  |
| H  | 0.87658800  | 5.72809900  | 0.77343200  |
| H  | 4.68792400  | 3.81296800  | 1.24147000  |
| O  | 2.08409900  | 2.49021200  | 5.25660900  |
| N  | 0.09350500  | 2.19629600  | 4.24161700  |
| C  | 1.40119400  | 2.66882000  | 4.26662400  |
| H  | 3.20068000  | 5.35888500  | 0.00405100  |
| H  | -0.11517700 | 1.56294400  | 5.00543300  |

Energy -1384.56215085 atomic units NIMAG = 1,  $v_I$  (cm<sup>-1</sup>) = 231i

Transition State for the reaction between benzohydrazide towards 1-chloro-2,4-dinitrobenzene  
(TS-2) calculated at the M05-2X/6-31G(d,p) level of theory in water (PCM)

|    |             |             |             |
|----|-------------|-------------|-------------|
| C  | 0.31550500  | -0.85083800 | 0.32238000  |
| C  | -0.00736300 | 0.68313100  | 2.25458600  |
| C  | 2.16060300  | 0.51328700  | 1.09698800  |
| C  | 1.62050900  | -0.43347000 | 0.19528600  |
| H  | -0.10543000 | -1.58160000 | -0.35195100 |
| Cl | -0.47479300 | 0.50786600  | 3.97298000  |
| N  | 2.43715400  | -0.97690700 | -0.84705900 |
| O  | 3.59421900  | -0.58729100 | -0.93290500 |
| O  | 1.94663100  | -1.80294100 | -1.60502900 |
| H  | 3.19735700  | 0.80283300  | 1.00503500  |
| N  | -0.91301500 | 2.25964100  | 1.86340300  |
| H  | -0.18900700 | 2.98024900  | 1.90521700  |
| N  | -1.99806700 | 2.65855100  | 2.63354800  |
| H  | -2.79433200 | 2.04077300  | 2.56468500  |
| H  | -1.18271700 | 2.14979400  | 0.88322100  |
| C  | -2.18136600 | 3.92103600  | 3.14727900  |
| O  | -3.29117400 | 4.26928400  | 3.50897700  |
| C  | -0.97700300 | 4.79495300  | 3.26970600  |
| C  | 0.20992200  | 4.32829700  | 3.84255800  |
| C  | -1.09320700 | 6.12802600  | 2.87339500  |
| C  | 1.28880000  | 5.19479700  | 3.99380900  |
| H  | 0.27594400  | 3.30869200  | 4.20655200  |
| C  | -0.00812700 | 6.98416800  | 3.01472900  |
| H  | -2.02838800 | 6.47747800  | 2.45522900  |
| C  | 1.18172000  | 6.51730000  | 3.57195000  |
| H  | 2.20475400  | 4.83896900  | 4.44685100  |
| H  | -0.09001800 | 8.01493200  | 2.69574200  |
| H  | 2.02347200  | 7.18835500  | 3.68456600  |
| C  | 1.39354500  | 1.02747800  | 2.09411100  |
| C  | -0.48068800 | -0.31629500 | 1.32511700  |
| N  | -1.84802900 | -0.72135600 | 1.36282300  |
| O  | -2.18807900 | -1.73290200 | 0.77155000  |
| O  | -2.63893800 | -0.00531400 | 1.97577000  |
| H  | 1.82215300  | 1.71059400  | 2.81560800  |

Energy -1556.94791598 atomic units NIMAG = 1,  $\nu_T$  (cm<sup>-1</sup>) = 211i

Transition State for the reaction between benzoic hydrazide towards 2-chloro-5-nitropyrimidine  
**(TS-1wHB)** calculated at the M05-2X/6-31G(d,p) level of theory in water (PCM).

|    |             |             |             |
|----|-------------|-------------|-------------|
| C  | -0.10154400 | -0.08890700 | 0.16387500  |
| C  | 0.03811600  | -0.19019900 | 2.41913300  |
| C  | 2.00692300  | -0.07121500 | 1.30109600  |
| C  | 1.28854100  | 0.07935400  | 0.11387700  |
| H  | -0.68126600 | -0.10369100 | -0.75103200 |
| N  | -0.73707100 | -0.26926500 | 1.29859600  |
| N  | 1.40382700  | -0.25713800 | 2.45730000  |
| Cl | -0.69349100 | -1.02410600 | 3.82234900  |
| N  | 1.96162500  | 0.26037000  | -1.13093900 |
| O  | 3.18176300  | 0.33693500  | -1.12107000 |
| O  | 1.28366100  | 0.33986400  | -2.14521600 |
| H  | 3.09008000  | -0.06753600 | 1.28886700  |
| N  | -0.28813800 | 1.58595500  | 3.02953700  |
| H  | -0.07894500 | 2.23075100  | 2.26910400  |
| N  | 0.53417300  | 1.83699500  | 4.11849300  |
| H  | 1.47169300  | 1.47951500  | 3.98738900  |
| H  | -1.29150300 | 1.65483700  | 3.27865500  |
| C  | 0.00524800  | 1.95503500  | 5.36843800  |
| O  | -1.18133600 | 2.20657800  | 5.55682500  |
| C  | 0.98283500  | 1.80513200  | 6.48160800  |
| C  | 0.74941600  | 2.53387800  | 7.64904300  |
| C  | 2.07297000  | 0.93492600  | 6.39971500  |
| C  | 1.62374800  | 2.41767800  | 8.72212200  |
| H  | -0.11272500 | 3.18614100  | 7.69771000  |
| C  | 2.93888200  | 0.81434600  | 7.48171800  |
| H  | 2.23014100  | 0.32022700  | 5.52041200  |
| C  | 2.71950500  | 1.55986500  | 8.63735800  |
| H  | 1.45101300  | 2.99075800  | 9.62375000  |
| H  | 3.77766600  | 0.13309700  | 7.42473600  |
| H  | 3.39766900  | 1.46611500  | 9.47595700  |
| H  | -2.81403600 | 1.74988400  | 4.52449200  |
| O  | -3.08614700 | 1.50421500  | 3.62802500  |
| H  | -3.26199900 | 0.55816800  | 3.66945900  |

Energy -1460.99852893 atomic units NIMAG = 1,  $v_I$  (cm<sup>-1</sup>) = 252i

Transition State for the reaction between benzoic hydrazide towards 2-chloro-5-nitropyrimidine

(TS-1nHB) calculated at the M05-2X/6-31G(d,p) level of theory in water (PCM)

|    |             |             |             |
|----|-------------|-------------|-------------|
| C  | -0.19277900 | 0.10647700  | 0.22528100  |
| C  | 0.02312300  | -0.15209300 | 2.47059900  |
| C  | 1.89221000  | 0.49198400  | 1.34052200  |
| C  | 1.10219200  | 0.65191600  | 0.19780600  |
| H  | -0.76640500 | 0.02815100  | -0.69076900 |
| N  | -0.72829200 | -0.35773600 | 1.32658100  |
| N  | 1.39497600  | 0.04240200  | 2.46975500  |
| Cl | -0.44452800 | -1.29423800 | 3.77692200  |
| N  | 1.64958600  | 1.19576700  | -0.99343600 |
| O  | 2.80494900  | 1.60273900  | -0.96677400 |
| O  | 0.93412400  | 1.25620300  | -1.98436600 |
| H  | 2.95345600  | 0.70813700  | 1.30570300  |
| N  | -0.63818400 | 1.34211200  | 3.11847300  |
| H  | -0.81826700 | 1.92468000  | 2.29706300  |
| H  | -1.53443400 | 1.14566400  | 3.56670600  |
| C  | 0.80306200  | 3.65284900  | 2.25092500  |
| C  | -0.47074500 | 4.19955200  | 2.05893000  |
| C  | 1.79820000  | 3.82483300  | 1.28592400  |
| C  | -0.74986600 | 4.89296500  | 0.88566500  |
| H  | -1.22723500 | 4.11283700  | 2.83118500  |
| C  | 1.50644600  | 4.50366500  | 0.10881200  |
| H  | 2.78491700  | 3.41432300  | 1.45853300  |
| C  | 0.23278500  | 5.03267400  | -0.09206000 |
| H  | -1.73057400 | 5.32518000  | 0.73796600  |
| H  | 2.26894200  | 4.61345200  | -0.65084600 |
| O  | 2.22143000  | 3.04478900  | 4.06559200  |
| H  | 2.62985100  | 1.27779200  | 5.16385500  |
| N  | 0.20387300  | 2.03006000  | 4.00252300  |
| C  | 1.15861800  | 2.89673000  | 3.48436900  |
| H  | 0.00743400  | 5.56151200  | -1.00902600 |
| H  | 0.60225300  | 1.40552100  | 4.71409200  |
| H  | 2.18423800  | 0.04319100  | 4.39846800  |
| O  | 2.18127100  | 0.42992500  | 5.28997600  |

Energy -1460.99381666 atomic units NIMAG = 1,  $\nu_T$  (cm<sup>-1</sup>) = 139i



**4-methoxy-*N*-(5-nitropyrimidin-2-yl)benzohydrazide.**

To a stirred solution of 4-methoxybenzhydrazide (91.4 mg, 0.55 mmol) in THF (15 mL) containing potassium carbonate (76 mg, 0.55 mmol) was added 2-chloro-5-nitropyrimidine (79.8 mg, 0.5 mmol) dissolved in THF (5.0 mL). The reaction mixture was stirred for 24 hours at room temperature, filtered and concentrated in vacuo. Purification by flash chromatography (ethyl acetate/hexane 1:2) gave 4-methoxy-*N*-(5-nitropyrimidin-2-yl)benzohydrazide (97 mg, 67%), mp 252-253 °C. <sup>1</sup>H-NMR (400 MHz, DMSO-*d*<sub>6</sub>) δ : 3.87 (s, 3H), 6.96 (d, *J* = 8.7 Hz, 2H), 7.96 (d, *J* = 8.7 Hz, 2H), 9.10 (s, 1H), 9.12 (s, 1H), 10.4 (s, 1H), 10.5 (s, 1H); <sup>13</sup>C-NMR (100 MHz, DMSO-*d*<sub>6</sub>) δ : 55.4, 114.2 (2C), 124.7, 129.9 (2C), 135.7, 155.6, 155.8, 162.3, 164.6, 165.6; FT-IR (KBr) 3270, 3108, 1626, 1599, 1538, 1434, 1346 cm<sup>-1</sup>. Anal. Calcd for C<sub>12</sub>H<sub>11</sub>N<sub>5</sub>O<sub>4</sub>: C, 49.83; H, 3.83; N, 24.21. Found: C, 49.70; H, 3.68; N, 24.32.

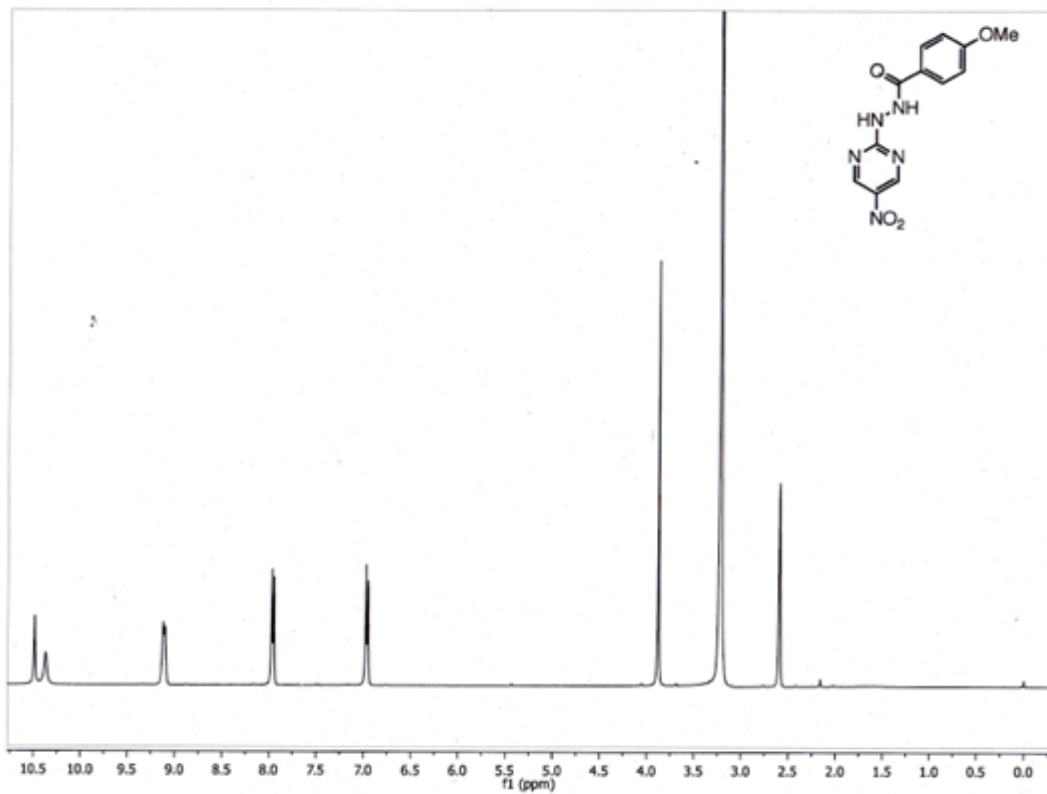

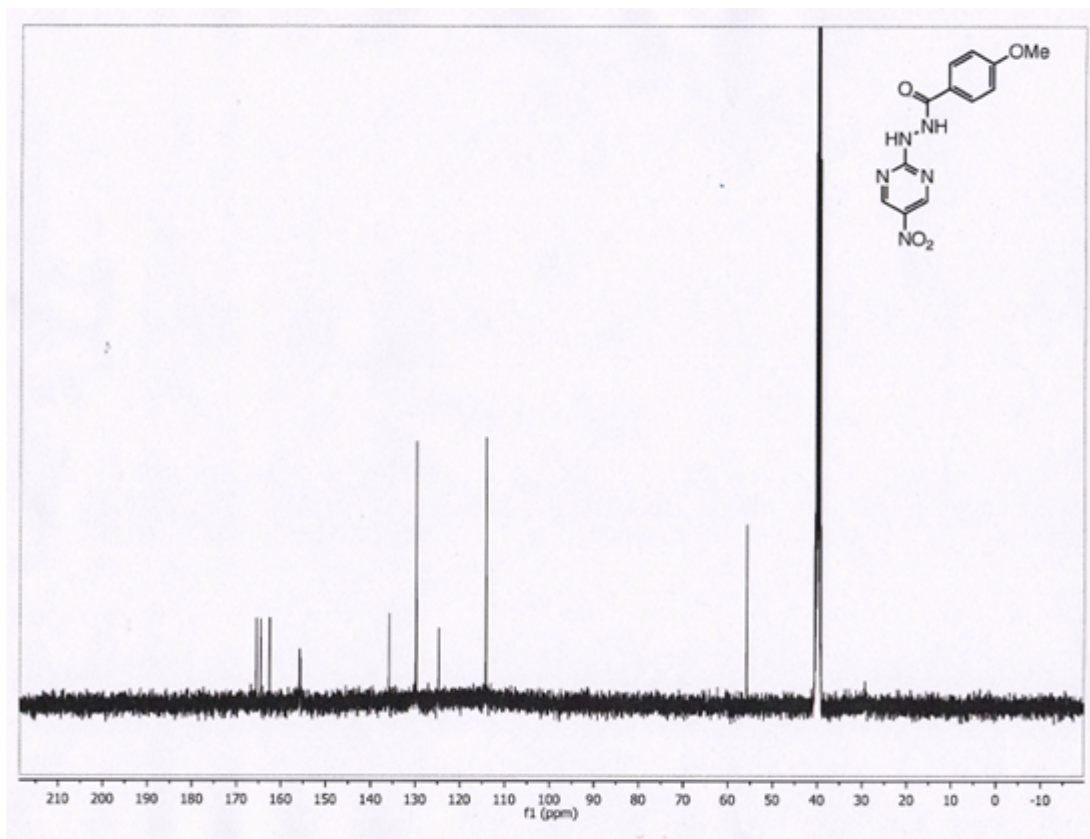

Supplement: c4ra04725g1.pdf [file c4ra04725g1.pdf]
